# Supplementary material for: Revealing the spatial distribution of chemical species within latent fingermarks using vibrational spectroscopy
Source: Royal Society of Chemistry journal article supplement (doi:10.1039/c7an01615h), 2018-01-01
Supplement: c7an01615h1.pdf [file c7an01615h1.pdf]

## Revealing the spatial distribution of chemical species within latent fingermarks using vibrational spectroscopy

Buddhika N. Dorakumbura,<sup>a, b</sup> Rhiannon E. Boseley,<sup>a, b</sup> Thomas Becker,<sup>a, b</sup> Danielle E. Martin,<sup>c</sup> Andrea Richter,<sup>d</sup> Mark J. Tobin<sup>c</sup> and Wilhelm van Bronswijk,<sup>a</sup> Jitraporn Vongsivut,<sup>c</sup> Mark J. Hackett,<sup>\*a, b</sup> Simon W. Lewis,<sup>\*a, b</sup>

### SUPPORTING INFORMATION

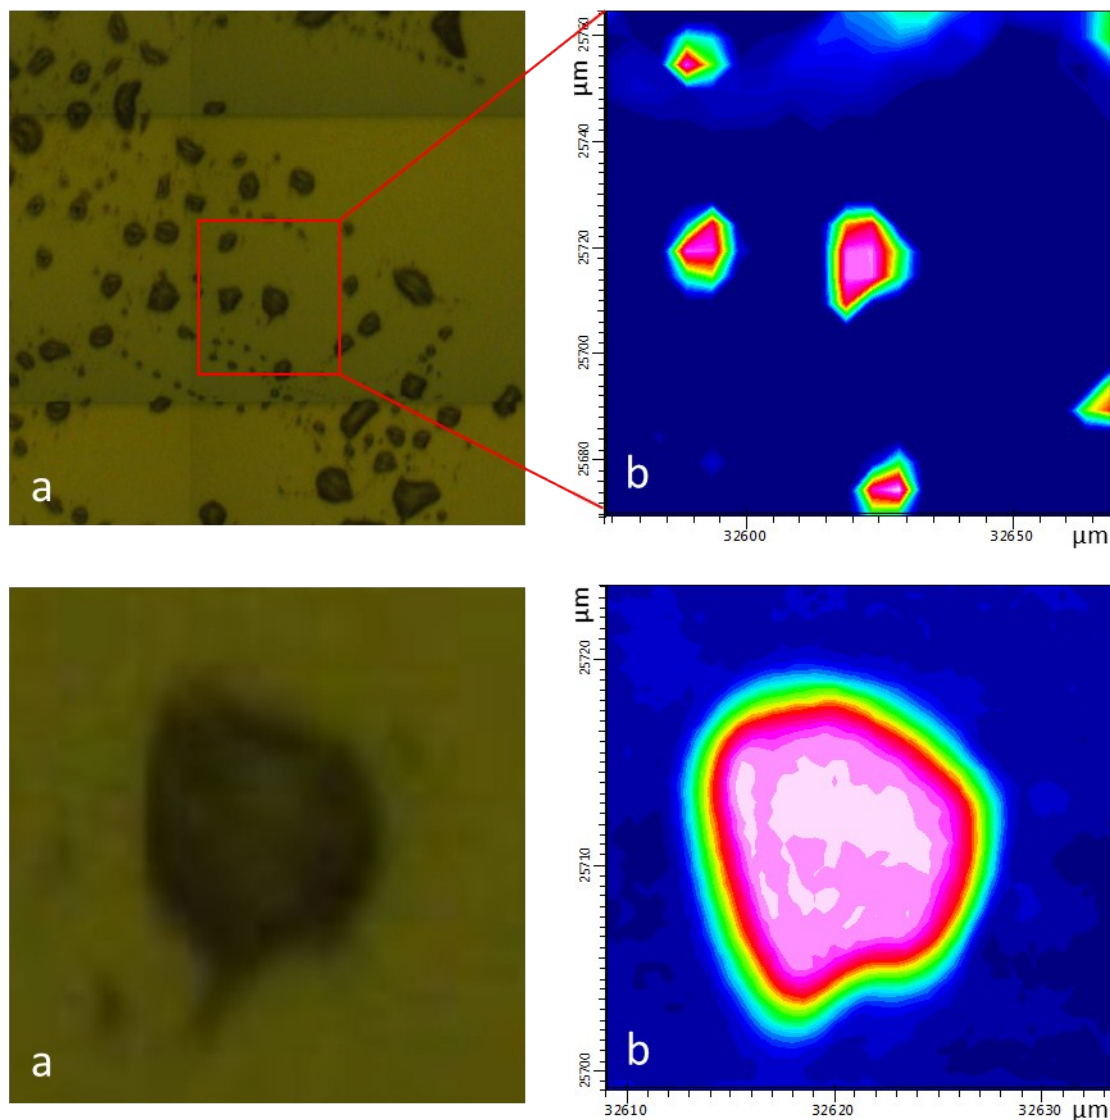

**Supporting Information Figure 1:** Course overview images of fingermark droplets imaged prior to contact with Ge crystal (a) and infrared images recorded after contact with the crystal (b) indicate that the location and morphology of fingermark droplets is not affected by this contact.

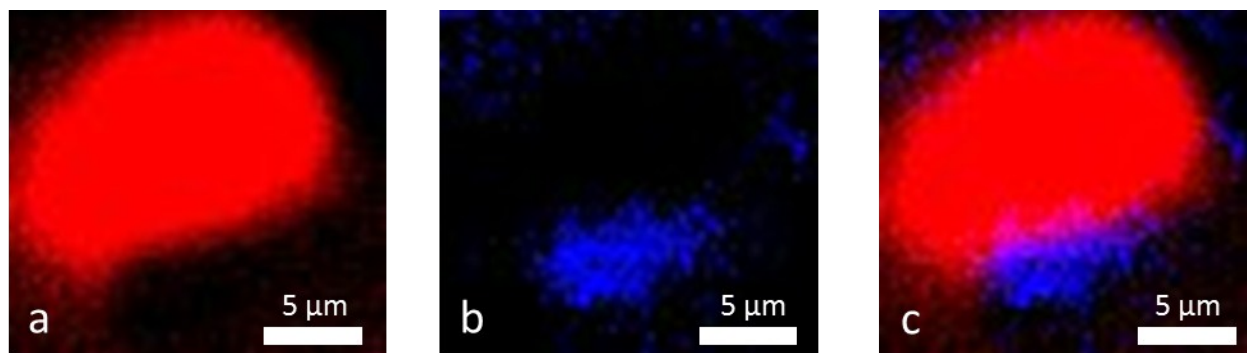

**Supporting Information Figure 2:** False colour image of fingermark droplet directly deposited on the Ge crystal, showing the characteristic lipid droplet (a) with small eccrine droplet (b) adhered to the periphery shown in overlay (c). A similar distribution of sebaceous and eccrine material was also observed in fingermarks deposited on glass slides, which were then brought into physical contact with the Ge crystal. The similarity in the results indicates that the physical contact between the glass slide and ATR crystal is not producing artefacts that confound the scientific conclusions of this study.
